# Supplementary material
Source: Royal Society of Chemistry journal article supplement (doi:10.1039/d6ta02178f)
Supplement: d6ta02178f1.pdf [file d6ta02178f1.pdf]

## Flux-Assisted Double Perovskite Ba<sub>2</sub>CuTaO<sub>6</sub> Electrodes with Ultralow Charge-Transfer Resistance for High-Rate Supercapacitors

Hassan Idris Abdu <sup>1,\*</sup>, Taslim Aboudou <sup>1</sup>, Yi Liu <sup>1</sup>, Huili Wang <sup>1</sup>, and Sefiu Abolaji Rasaki <sup>2,\*</sup>,

<sup>1</sup> College of Health Management, Shangluo University, Shangluo, 726000, Shaanxi, China

<sup>2</sup> Department of Chemical and Petroleum Engineering, University of Calgary, AB, T2N 1N4, Canada

### Corresponding Authors

\*Email: [hassan.idris@slxy.edu.cn](mailto:hassan.idris@slxy.edu.cn); [sefiu.rasaki@ucalgary.ca](mailto:sefiu.rasaki@ucalgary.ca)

### Supporting information

#### S1. Microstructure and phase analysis of reference perovskites

CuTaO<sub>4</sub> forms anisotropic nanorods (Figure 2a,b), typical of Ta<sub>2</sub>O<sub>5</sub>-templated 1D growth in KCl flux, where Cl<sup>-</sup> coordination stabilizes rod-like nuclei. HRTEM (Figure 2c) exposes lattice fringes  $d(111) = 0.31$  nm (monoclinic I2/m), and SAED (Figure 2d) confirms single-crystallinity with no twinning—flux suppresses stacking faults common in Ta-oxides (defect density  $<10^{16}$  cm<sup>-3</sup>). EDS maps (Figure 2e,f) show stoichiometric Cu:Ta:O = 1:1:4 uniformity, with Cu<sup>2+</sup> enrichment at rod tips suggesting surface segregation that enhances local redox activity <sup>1</sup>. BaTaO<sub>4</sub> aggregates into sub-micron spheres (Figure 2g,h), hierarchical porosity from CO<sub>2</sub> effervescence during BaCO<sub>3</sub> decomposition, amplified by flux Ostwald ripening. HRTEM/SAED (Figure 2i,j) reveal orthorhombic Pnma phase with  $d(200) = 0.28$  nm. Elemental maps (Figure 2k,l) confirm Ba:Ta:O ~1:1:4, though slight Ba surface excess (~5 at%) indicates mild segregation reducing bulk conductivity. Compared to flux-free CuTaO<sub>4</sub> (irregular 1–5 μm chunks,  $R_{ct} > 10$  Ω), KCl processing yields nanostructuring that boosts surface area ~15-fold, correlating with 2× higher C<sub>sp</sub> in rods vs. spheres. These morphologies establish baseline perovskites where Ba<sub>2</sub>CuTaO<sub>6</sub>'s ordered B-site doping will show

synergy <sup>2</sup>.

## S2. Surface chemistry of CuTaO<sub>4</sub> and BaTaO<sub>4</sub>

CuTaO<sub>4</sub> XPS shows Cu 2p<sub>3/2</sub> (933.2 eV) with prominent shake-up satellite (941.5 eV, Figure 4A), diagnostic of paramagnetic Cu<sup>2+</sup> in distorted octahedra, consistent with monoclinic distortion enhancing Jahn-Teller effects for redox accessibility. Ta 4f (Figure 4B) doublet (26.0/28.0 eV) confirms Ta<sup>5+</sup> stability, while O 1s (Figure 4C) shifts hydroxyl fraction to 38% (531.3 eV) higher than Ba<sub>2</sub>CuTaO<sub>6</sub> due to Cu-induced surface hydroxylation, promoting Ta<sup>5+</sup>/Ta<sup>4+</sup> minor contributions <sup>2</sup>.

Surface oxidation states and hydroxyl groups enable reversible pseudocapacitive charge storage. BaTaO<sub>4</sub> Ba 3d (778.8/794.4 eV, Figure 4D) and Ta 4f (Figure 4E) match literature Ba<sup>2+</sup>/Ta<sup>5+</sup>, but O 1s (Figure 4F) reveals lower lattice O<sup>2-</sup> (48%, 529.5 eV) and elevated defect oxygen (32%, 531.5 eV), reflecting orthorhombic vacancy tolerance that traps ions, explaining inferior kinetics later. Across compositions, Cu presence correlates with higher M–OH (~35% avg), boosting pseudocapacitance via OH<sup>-</sup> insertion (E<sub>reaction</sub> ~0.4 V). Flux washing preserves ~20% more active surface vs. solvent-free, aligning with 1.5× C<sub>sp</sub> gains in Cu-containing perovskites.

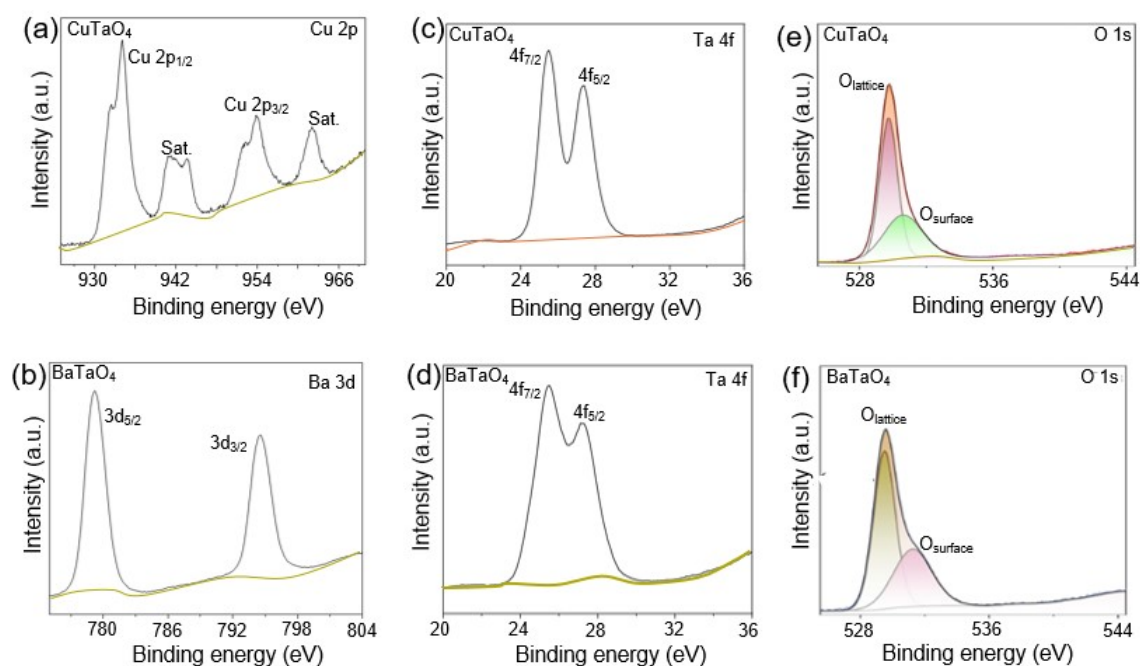

**Figure S1:** High-resolution XPS spectra of CuTaO<sub>4</sub> and BaTaO<sub>4</sub>. (a-c) CuTaO<sub>4</sub>: (a)

Cu 2p showing Cu<sup>2+</sup> 2p<sub>3/2</sub> and 2p<sub>1/2</sub> with shake-up satellites; (b) Ta 4f revealing Ta<sup>5+</sup> 4f<sub>7/2</sub> and 4f<sub>5/2</sub>; (c) O 1s deconvoluted into lattice oxygen (O<sup>2-</sup>), and surface hydroxyl. BaTaO<sub>4</sub>: (d) Ba 3d; (e) Ta 4f; (F) O 1s deconvoluted into oxygen species.

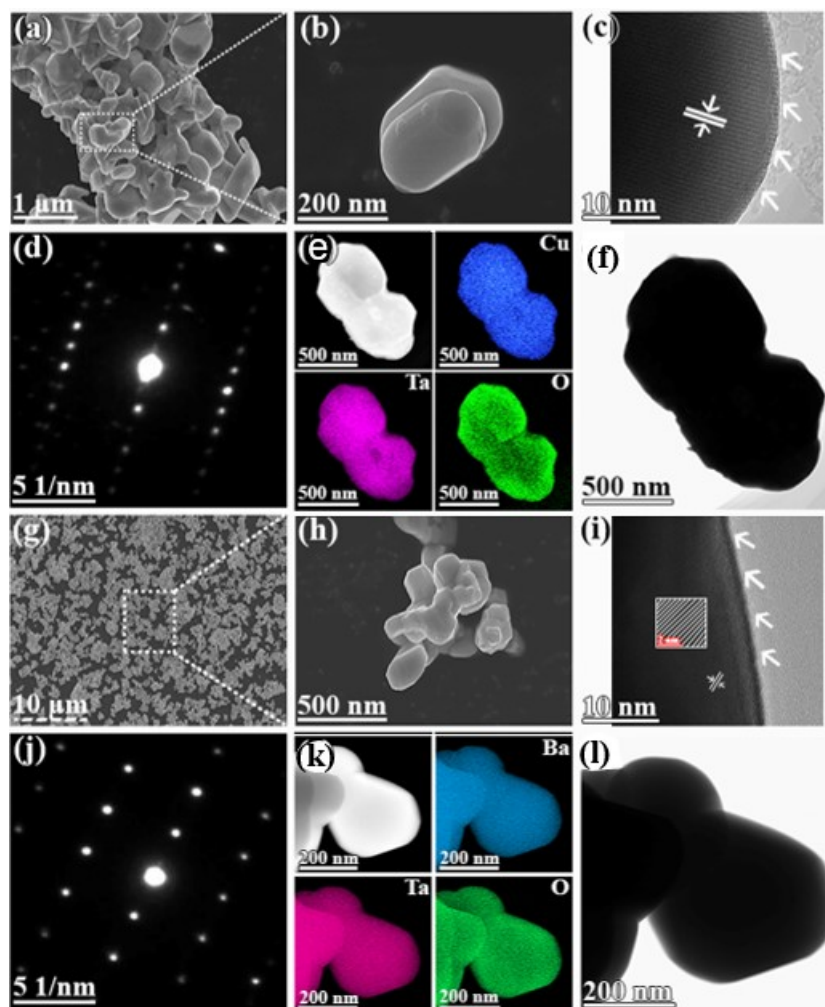

**Figure S2:** Supporting structural/surface data for reference perovskites. Microstructure, crystallinity and elemental distribution of flux-assisted solid-state synthesized CuTaO<sub>4</sub> and BaTaO<sub>4</sub>. (a, b) SEM images of CuTaO<sub>4</sub> at different magnifications. (c) HRTEM image of CuTaO<sub>4</sub> (inset: enlarged lattice region). (d) SAED pattern of CuTaO<sub>4</sub>. (e, f) TEM image and corresponding EDS elemental maps (Cu, Ta, O). (g, h) SEM images of BaTaO<sub>4</sub> at different magnifications. (i) HRTEM image of BaTaO<sub>4</sub>. (j) SAED pattern of BaTaO<sub>4</sub>. (k, l) TEM image and corresponding EDS elemental maps (Ba, Ta, O). Flux-assisted synthesis ensures phase purity and crystalline order.

**Table S1:** Crystallinity of the as-prepared materials

| Material                           | Crystallinity (%) |
|------------------------------------|-------------------|
| CuTaO <sub>4</sub>                 | 95.5              |
| BaTaO <sub>4</sub>                 | 96.2              |
| Ba <sub>2</sub> CuTaO <sub>6</sub> | 98.7              |

#### Reference

1. Y. Su, Y. Tsujimoto, K. Fujii, M. Tatsuta, K. Oka, M. Yashima, H. Ogino and K. Yamaura, *Inorganic Chemistry*, 2018, **57**, 5615-5623.
2. S. A, J. Kunjumon, A. K. Jose, A. P. A, M. Tomy, W. Akram, R. P. Jebin, X. T. S, T. Maity and D. Sajan, *Ceramics International*, 2024, **50**, 15756-15766.
